# Supplementary material for: Interferon-α alters host glycosylation machinery during treated HIV infection
Source: PubMed Central journal article supplement — eBioMedicine. 2020 Aug 19;59:102945. doi: 10.1016/j.ebiom.2020.102945 (PMC7452630; doi:10.1016/j.ebiom.2020.102945), 2020-08-19
Supplement: mmc2.pdf [file mmc2.pdf]

# Supplementary Figure 2

## Plasma *N*-glycome

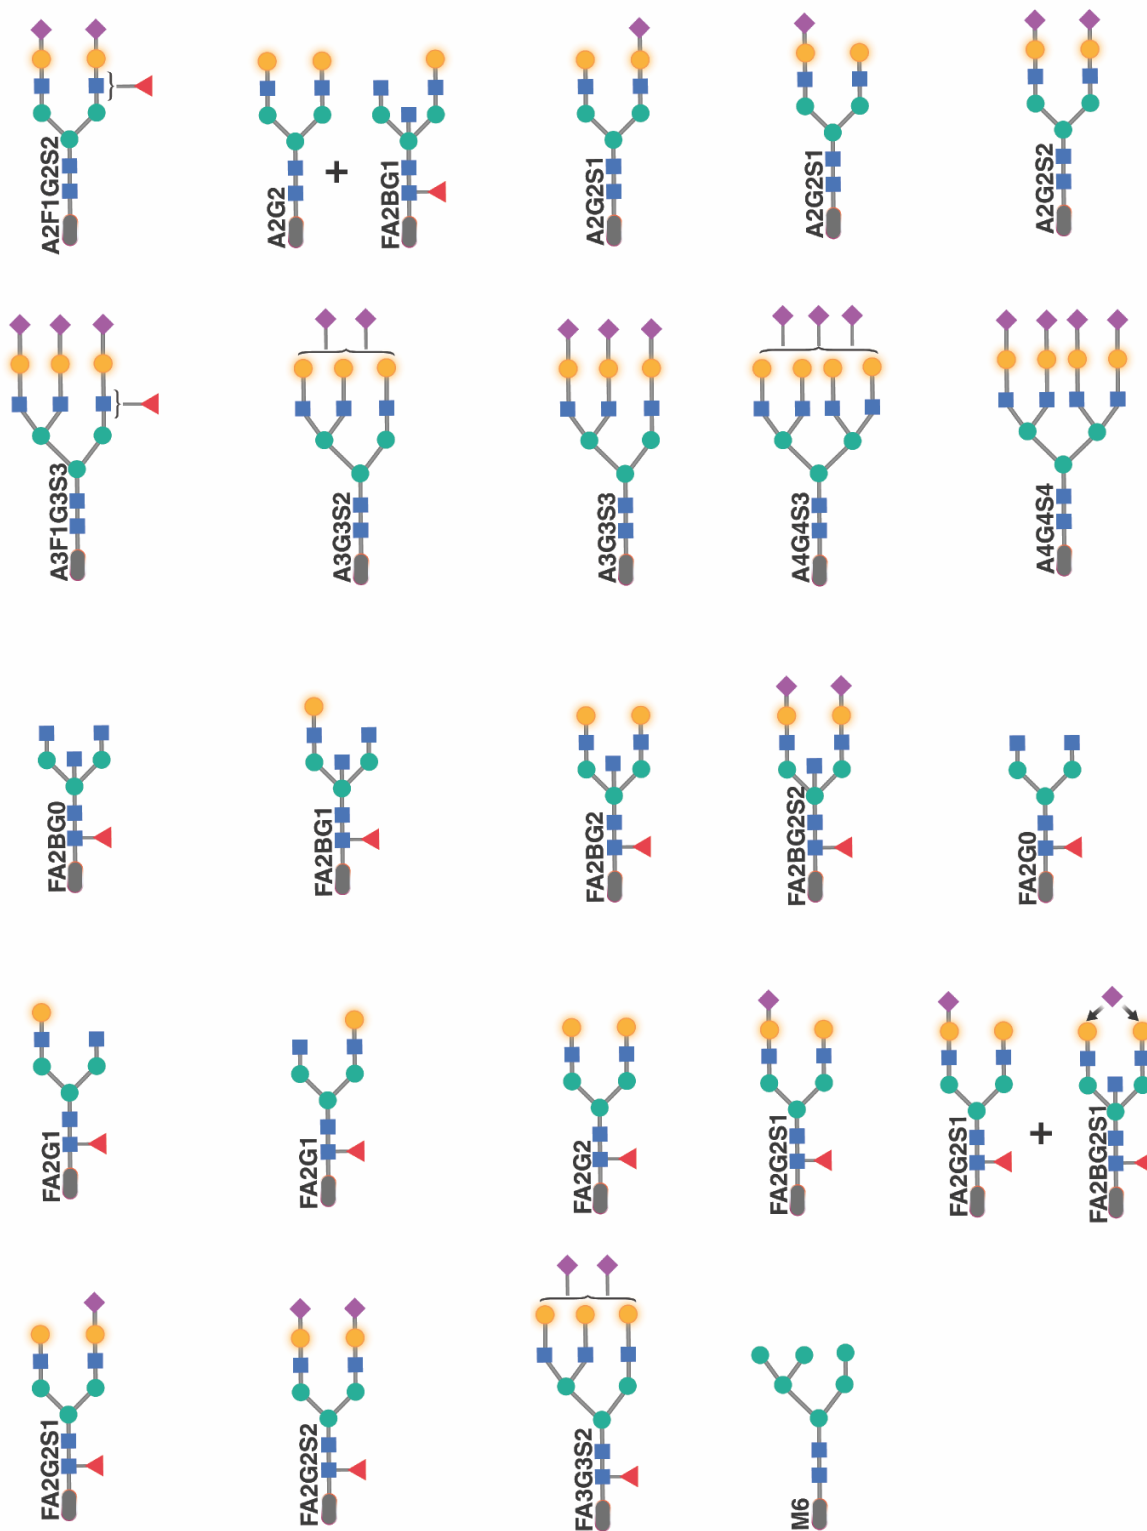

- ▼ Fucose
- *N*-acetylglucosamine
- Mannose
- Galactose
- ◆ *N*-acetylneuraminic acid
