# Supplementary material for: Interferon-α alters host glycosylation machinery during treated HIV infection
Source: PubMed Central journal article supplement — eBioMedicine. 2020 Aug 19;59:102945. doi: 10.1016/j.ebiom.2020.102945 (PMC7452630; doi:10.1016/j.ebiom.2020.102945), 2020-08-19
Supplement: mmc6.pdf [file mmc6.pdf]

**Supplementary Table 1.** Levels of pro and anti-inflammatory cytokines and markers measured in the study.

| Marker              | Visit | n tested | n with detectable values | Median (pg/ml) | Visit 13 compared to visit 8<br>p value | Visit 25 compared to visit 8<br>p value |
|---------------------|-------|----------|--------------------------|----------------|-----------------------------------------|-----------------------------------------|
| <i>Galectin-3</i>   | 8     | 18       | 18                       | 115.2          | 0.22875                                 | 0.14023                                 |
|                     | 13    | 18       | 18                       | 118.8          |                                         |                                         |
|                     | 25    | 7        | 7                        | 129.8          |                                         |                                         |
| <i>Galectin-3BP</i> | 8     | 18       | 18                       | 30523.7        | 0.00233                                 | 0.01825                                 |
|                     | 13    | 18       | 18                       | 55019.1        |                                         |                                         |
|                     | 25    | 7        | 7                        | 81722.5        |                                         |                                         |
| <i>Galectin-1</i>   | 8     | 18       | 18                       | 10312.9        | 0.07093                                 | 0.60031                                 |
|                     | 13    | 18       | 18                       | 9889.9         |                                         |                                         |
|                     | 25    | 7        | 7                        | 10572.7        |                                         |                                         |
| <i>Galectin-9</i>   | 8     | 18       | 18                       | 3858.2         | 1.55E-06                                | 0.00039                                 |
|                     | 13    | 18       | 18                       | 7279.8         |                                         |                                         |
|                     | 25    | 7        | 7                        | 8426.3         |                                         |                                         |
| <i>L-Selectin</i>   | 8     | 18       | 18                       | 139262.9       | 0.02801                                 | 0.45461                                 |
|                     | 13    | 18       | 18                       | 163696.5       |                                         |                                         |
|                     | 25    | 7        | 7                        | 159446.5       |                                         |                                         |
| <i>E-Selectin</i>   | 8     | 18       | 18                       | 32903.8        | 0.00769                                 | 0.57813                                 |
|                     | 13    | 18       | 18                       | 145085.3       |                                         |                                         |
|                     | 25    | 7        | 7                        | 161816.5       |                                         |                                         |
| <i>IFN-gamma</i>    | 8     | 18       | 18                       | 19.9           | 0.15135                                 | 0.57813                                 |
|                     | 13    | 18       | 18                       | 43.7           |                                         |                                         |
|                     | 25    | 7        | 7                        | 51.3           |                                         |                                         |
| <i>IL-10</i>        | 8     | 18       | 18                       | 13.1           | 0.00019                                 | 0.2156                                  |
|                     | 13    | 18       | 18                       | 7.8            |                                         |                                         |
|                     | 25    | 7        | 7                        | 7.2            |                                         |                                         |
| <i>IL-12p40</i>     | 8     | 18       | 18                       | 19.7           | 0.04134                                 | 0.31404                                 |
|                     | 13    | 18       | 18                       | 19.3           |                                         |                                         |
|                     | 25    | 7        | 7                        | 16.2           |                                         |                                         |
| <i>IL-15</i>        | 8     | 18       | 18                       | 77.9           | 0.60946                                 | 0.35415                                 |
|                     | 13    | 18       | 18                       | 70.9           |                                         |                                         |
|                     | 25    | 7        | 7                        | 75.2           |                                         |                                         |
| <i>IL-17A</i>       | 8     | 18       | 18                       | 27.8           | 0.00033                                 | 0.07813                                 |
|                     | 13    | 18       | 18                       | 17.8           |                                         |                                         |
|                     | 25    | 7        | 7                        | 17.95          |                                         |                                         |
| <i>IL-18</i>        | 8     | 18       | 18                       | 105.98         | 0.00025                                 | 0.06594                                 |
|                     | 13    | 18       | 18                       | 166.3          |                                         |                                         |
|                     | 25    | 7        | 7                        | 173.           |                                         |                                         |
| <i>IL-22</i>        | 8     | 18       | 18                       | 257.9          | 0.79871                                 | 0.57813                                 |
|                     | 13    | 18       | 18                       | 245.6          |                                         |                                         |
|                     | 25    | 7        | 7                        | 245.9          |                                         |                                         |
| <i>IL-4</i>         | 8     | 18       | 18                       | 50.1           | 0.32473                                 | 0.9375                                  |
|                     | 13    | 18       | 18                       | 25.04          |                                         |                                         |
|                     | 25    | 7        | 7                        | 39.07          |                                         |                                         |
| <i>IP-10</i>        | 8     | 18       | 18                       | 17.4           | 0.72711                                 | 0.88764                                 |
|                     | 13    | 18       | 18                       | 19.9           |                                         |                                         |
|                     | 25    | 7        | 7                        | 18.6           |                                         |                                         |
| <i>P-Selectin</i>   | 8     | 18       | 18                       | 34832.9        | 0.21214                                 | 0.8125                                  |
|                     | 13    | 18       | 18                       | 62485.3        |                                         |                                         |
|                     | 25    | 7        | 7                        | 84845.2        |                                         |                                         |
| <i>RANTES</i>       | 8     | 18       | 18                       | 54.8           | 0.00215                                 | 0.013                                   |
|                     | 13    | 18       | 18                       | 73.1           |                                         |                                         |
|                     | 25    | 7        | 7                        | 81.2           |                                         |                                         |
| <i>TNF-alpha</i>    | 8     | 18       | 18                       | 62.4           | 0.00019                                 | 0.14838                                 |
|                     | 13    | 18       | 18                       | 37.1           |                                         |                                         |
|                     | 25    | 7        | 7                        | 39.6           |                                         |                                         |
| <i>sCD163</i>       | 8     | 18       | 18                       | 384149.96      | 0.00083                                 | 0.00688                                 |
|                     | 13    | 18       | 18                       | 455006.44      |                                         |                                         |
|                     | 25    | 7        | 7                        | 561883.2       |                                         |                                         |
| <i>sCD14</i>        | 8     | 18       | 18                       | 1216664.       | 0.02651                                 | 0.2616                                  |
|                     | 13    | 18       | 18                       | 1529000.8      |                                         |                                         |
|                     | 25    | 7        | 7                        | 1470033.1      |                                         |                                         |
| <i>TGFβ-1</i>       | 8     | 18       | 18                       | 457.28         | 0.7019                                  | 0.9375                                  |
|                     | 13    | 18       | 18                       | 476.83         |                                         |                                         |
|                     | 25    | 7        | 7                        | 614.8          |                                         |                                         |
| <i>TGFβ-2</i>       | 8     | 18       | 6                        | 2.4            | 0.25                                    | -                                       |
|                     | 13    | 18       | 6                        | 2.4            |                                         |                                         |
|                     | 25    | 7        | 2                        | 3.3            |                                         |                                         |
| <i>TGFβ-3</i>       | 8     | 18       | 0                        | NA             | -                                       | -                                       |
|                     | 13    | 18       | 0                        | NA             |                                         |                                         |
|                     | 25    | 7        | 0                        | NA             |                                         |                                         |
