# Supplementary material for: Interferon-α alters host glycosylation machinery during treated HIV infection
Source: PubMed Central journal article supplement — eBioMedicine. 2020 Aug 19;59:102945. doi: 10.1016/j.ebiom.2020.102945 (PMC7452630; doi:10.1016/j.ebiom.2020.102945), 2020-08-19
Supplement: mmc8.pdf [file mmc8.pdf]

Supplementary Table 3. Lectins used in the 96-plex lectin microarray.

| Name                | Species                            | Origin      | Glycan specificity <sup>1,2</sup>                                                   |
|---------------------|------------------------------------|-------------|-------------------------------------------------------------------------------------|
| 1 LFA               | <i>Limax flavus</i>                | Natural     | Sia                                                                                 |
| 2 WGA               | <i>Triticum vulgare</i>            | Natural     | (GlcNAc) <sub>n</sub> , polySia                                                     |
| 3 PVL               | <i>Psathyrella velutina</i>        | Natural     | Sia, GlcNAc                                                                         |
| 4 MAL               | <i>Maackia amurensis</i>           | Natural     | α2-3Sia                                                                             |
| 5 MAH               | <i>Maackia amurensis</i>           | Natural     | α2-3Sia                                                                             |
| 6 ACG               | <i>Agroclybe cylindracea</i>       | Natural     | α2-3Sia                                                                             |
| 7 rACG              | <i>Agroclybe cylindracea</i>       | Recombinant | α2-3Sia                                                                             |
| 8 rGal8N            | <i>Homo sapiens</i>                | Recombinant | α2-3Sia                                                                             |
| 9 SNA               | <i>Sambucus nigra</i>              | Natural     | α2-6Sia                                                                             |
| 10 SSA              | <i>Sambucus sieboldiana</i>        | Natural     | α2-6Sia                                                                             |
| 11 TJAI             | <i>Trichosanthes japonica</i>      | Natural     | α2-6Sia                                                                             |
| 12 rPSL1a           | <i>Polyporus squamosus</i>         | Recombinant | α2-6Sia                                                                             |
| 13 PHAL             | <i>Phaseolus vulgaris</i>          | Natural     | GlcNAcβ1-6Man (Tetraantenna)                                                        |
| 14 DSA              | <i>Datura stramonium</i>           | Natural     | GlcNAcβ1-6Man (Tetraantenna)                                                        |
| 15 TxLcI            | <i>Tulipa gesneriana</i>           | Natural     | Galactosylated N-glycans up to triantenna                                           |
| 16 ECA              | <i>Erythrina cristagalli</i>       | Natural     | βGal                                                                                |
| 17 RCA120           | <i>Ricinus communis</i>            | Natural     | βGal                                                                                |
| 18 rGal7            | <i>Homo sapiens</i>                | Recombinant | Type1 LacNAc, chondroitin polymer                                                   |
| 19 rGal9N           | <i>Homo sapiens</i>                | Recombinant | GalNAcα1-4Gal (A), PolyLacNAc                                                       |
| 20 rGal9C           | <i>Homo sapiens</i>                | Recombinant | PolyLacNAc, Branched LacNAc                                                         |
| 21 rC14             | <i>Gallus gallus domesticus</i>    | Recombinant | Branched LacNAc                                                                     |
| 22 rDiscoidin II    | <i>Dictyostelium discoideum</i>    | Recombinant | LacNAc, Galβ1-3GalNAc (T), GalNAc (Tn)                                              |
| 23 BPL              | <i>Bauhinia purpurea alba</i>      | Natural     | Galβ1-3GlcNAc(GalNAc), αβGalNAc                                                     |
| 24 rCGL2            | <i>Homo sapiens</i>                | Recombinant | GalNAcα1-3Gal (A), PolyLacNAc                                                       |
| 25 PHAE             | <i>Phaseolus vulgaris</i>          | Natural     | bisecting GlcNAc                                                                    |
| 26 GSLII            | <i>Griffonia simplicifolia</i>     | Natural     | GlcNAcβ1-4Man                                                                       |
| 27 rSRL             | <i>Sclerotium rotsii</i>           | Recombinant | Galβ1-3GalNAc (T), GalNAcα (Tn)                                                     |
| 28 UDA              | <i>Urtica dioica</i>               | Natural     | (GlcNAc) <sub>n</sub>                                                               |
| 29 PWM              | <i>Phytolacca americana</i>        | Natural     | (GlcNAc) <sub>n</sub>                                                               |
| 30 rF17AG           | <i>Escherichia coli</i>            | Recombinant | GlcNAc                                                                              |
| 31 rGRFT            | <i>Griffithia sp.</i>              | Recombinant | Man                                                                                 |
| 32 NPA              | <i>Narcissus pseudonarcissus</i>   | Natural     | Manα1-3Man                                                                          |
| 33 ConA             | <i>Canavalia ensiformis</i>        | Natural     | M3, Manα1-2Manα1-3(Manα1-6)Man, GlcNAcβ1-2Manα1-3(Manα1-6)Man                       |
| 34 GNA              | <i>Galanthus nivalis</i>           | Natural     | Manα1-3Man, Manα1-6Man                                                              |
| 35 HHL              | <i>Hippeastrum hybrid</i>          | Natural     | Manα1-3Man, Manα1-6Man                                                              |
| 36 ASA              | <i>Allium sativum</i>              | Natural     | Galβ1-4GlcNAcβ1-2Man                                                                |
| 37 DBAI             | <i>Dioscorea batatas</i>           | Natural     | High-man                                                                            |
| 38 CCA              | <i>Castanea crenata</i>            | Natural     | Galactosylated N-glycans up to triantenna                                           |
| 39 Helituba         | <i>Helianthus tuberosus</i>        | Natural     | Manα1-3Man                                                                          |
| 40 rHelituba        | <i>Helianthus tuberosus</i>        | Recombinant | Manα1-3Man                                                                          |
| 41 ADA              | <i>Allomyrina dictyoma</i>         | Natural     | α2-6Sia, Forssman, A, B                                                             |
| 42 VVAII            | <i>Vicia villosa</i>               | Natural     | Man, Agalacto                                                                       |
| 43 rOryzata         | <i>Oryza sativa</i>                | Recombinant | Manα1-3Man, Highman, biantenna                                                      |
| 44 rPALa            | <i>Phlebotomus aureum</i>          | Recombinant | Man5, biantenna                                                                     |
| 45 rBanana          | <i>Musa acuminata</i>              | Recombinant | Manα1-2Manα1-3(6)Man                                                                |
| 46 rCalsepa         | <i>Calystegia sepium</i>           | Recombinant | Biantenna with bisecting GlcNAc                                                     |
| 47 rSL              | <i>Ralstonia solanacearum</i>      | Recombinant | αMan, α1-2Fuc (H), α1-3Fuc (Le <sup>a</sup> ), α1-4Fuc (Le <sup>b</sup> )           |
| 48 rBC2LA           | <i>Burkholderia cenocepacia</i>    | Recombinant | αMan, High-man                                                                      |
| 49 AOL              | <i>Aspergillus oryzae</i>          | Natural     | α1-6Fuc (Core), α1-2Fuc (H), α1-3Fuc (Le <sup>a</sup> ), α1-3Fuc (Le <sup>b</sup> ) |
| 50 AAL              | <i>Aleuria aurantia</i>            | Natural     | α1-6Fuc (Core), α1-2Fuc (H), α1-3Fuc (Le <sup>a</sup> ), α1-3Fuc (Le <sup>b</sup> ) |
| 51 rAAL             | <i>Aleuria aurantia</i>            | Recombinant | α1-6Fuc (Core), α1-2Fuc (H), α1-3Fuc (Le <sup>a</sup> ), α1-3Fuc (Le <sup>b</sup> ) |
| 52 rPAII            | <i>Pseudomonas aeruginosa</i>      | Recombinant | αMan, α1-2Fuc (H), α1-3Fuc (Le <sup>a</sup> ), α1-4Fuc (Le <sup>b</sup> )           |
| 53 rSIIL            | <i>Ralstonia solanacearum</i>      | Recombinant | α1-2Fuc (H), α1-3Fuc (Le <sup>a</sup> ), α1-3Fuc (Le <sup>b</sup> )                 |
| 54 PTL              | <i>Pholiota terrestris</i>         | Recombinant | α1-6Fuc                                                                             |
| 55 PSA              | <i>Pisum sativum</i>               | Natural     | α1-6Fuc up to biantenna                                                             |
| 56 LCA              | <i>Lens culinaris</i>              | Natural     | α1-6Fuc up to biantenna                                                             |
| 57 rAOL             | <i>Aspergillus oryzae</i>          | Recombinant | α1-2Fuc (H), α1-3Fuc (Lex), α1-3Fuc (Lea)                                           |
| 58 rBC2LCN          | <i>Burkholderia cenocepacia</i>    | Recombinant | Fuc α1-2Galβ1-3GlcNAc (GalNAc)                                                      |
| 59 LTL              | <i>Lotus tetragonolobus</i>        | Natural     | Fuc (Le <sup>a</sup> , Le <sup>b</sup> )                                            |
| 60 UEAI             | <i>Ulex europaeus</i>              | Natural     | α1-2Fuc                                                                             |
| 61 TJAI             | <i>Trichosanthes japonica</i>      | Natural     | α1-2Fuc                                                                             |
| 62 MCA              | <i>Momordica charantia</i>         | Natural     | α1-2Fuc                                                                             |
| 63 GSLI             | <i>Griffonia simplicifolia</i>     | Natural     | αGalNAc (A, Tn), αGal (B)                                                           |
| 64 PTU              | <i>Psophocarpus tetragonolobus</i> | Natural     | αGalNAc (A, Tn)                                                                     |
| 65 GSLIA4           | <i>Griffonia simplicifolia</i>     | Natural     | αGalNAc (A, Tn)                                                                     |
| 66 rGC2             | <i>Geodia cydonium</i>             | Recombinant | α1-2Fuc (H), αGalNAc (A), αGal (B)                                                  |
| 67 GSLIB4           | <i>Griffonia simplicifolia</i>     | Natural     | αGal (B)                                                                            |
| 68 rMOA             | <i>Marasmius cretades</i>          | Recombinant | αGal (B)                                                                            |
| 69 EEL              | <i>Euonymus europaeus</i>          | Natural     | αGal (B)                                                                            |
| 70 rPAII            | <i>Pseudomonas aeruginosa</i>      | Recombinant | αβGal, αGalNAc (Tn)                                                                 |
| 71 LEL              | <i>Lycopersicon esculentum</i>     | Natural     | Polyactosamine, (GlcNAc) <sub>n</sub>                                               |
| 72 STL              | <i>Solanum tuberosum</i>           | Natural     | Polyactosamine, (GlcNAc) <sub>n</sub>                                               |
| 73 rGal3C           | <i>Homo sapiens</i>                | Recombinant | LacNAc, polyactosamine                                                              |
| 74 rLSLN            | <i>Laetiporus sulphureus</i>       | Recombinant | LacNAc, polyactosamine                                                              |
| 75 rCGL3            | <i>Coprinopsis cinerea</i>         | Recombinant | LacDINAc                                                                            |
| 76 PNA              | <i>Arachis hypogaea</i>            | Natural     | Galβ1-3GalNAc (T), GalNAcα (Tn)                                                     |
| 77 ACA              | <i>Amaranthus caudatus</i>         | Natural     | Galβ1-3GalNAc (T), GalNAcα (Tn)                                                     |
| 78 HEA              | <i>Helicium erinaceum</i>          | Natural     | Galβ1-3GalNAc (T)                                                                   |
| 79 ABA              | <i>Agaricus bisporus</i>           | Natural     | Galβ1-3GalNAc (T), GlcNAc                                                           |
| 80 Jacalin          | <i>Artocarpus integrifolia</i>     | Natural     | Galβ1-3GalNAc (T), GalNAcα (Tn)                                                     |
| 81 MPA              | <i>Maclura pomifera</i>            | Natural     | Galβ1-3GalNAc (T), GalNAcα (Tn)                                                     |
| 82 HPA              | <i>Helix pomatia</i>               | Natural     | αGalNAc (A, Tn)                                                                     |
| 83 VVA              | <i>Vicia villosa</i>               | Natural     | αβGalNAc (A, Tn, LacDINAc)                                                          |
| 84 DBA              | <i>Dolichos biflorus</i>           | Natural     | αβGalNAc (A, Tn, LacDINAc)                                                          |
| 85 SBA              | <i>Glycine max</i>                 | Natural     | αβGalNAc (A, Tn, LacDINAc)                                                          |
| 86 rPPL             | <i>Pleurocybella porrigens</i>     | Recombinant | αβGalNAc (A, Tn, LacDINAc)                                                          |
| 87 rCNL             | <i>Clitocybe nebularis</i>         | Recombinant | αβGalNAc (A, Tn, LacDINAc)                                                          |
| 88 rXCL             | <i>Xerocomus chrysenteron</i>      | Recombinant | Core1,3, agalacto N-glycan                                                          |
| 89 VVA I            | <i>Vicia villosa</i>               | Natural     | GalNAcβ1-3(4)Gal                                                                    |
| 90 WFA              | <i>Wisteria floribunda</i>         | Natural     | Terminal GalNAc, LacDINAc                                                           |
| 91 rABA             | <i>Agaricus bisporus</i>           | Recombinant | Galβ1-3GalNAc (T), GlcNAc                                                           |
| 92 rDiscoidin I     | <i>Dictyostelium Discoideum</i>    | Recombinant | Gal                                                                                 |
| 93 DBAII            | <i>Dioscorea batatas</i>           | Natural     | Maltose                                                                             |
| 94 rMlectin         | <i>Homo sapiens</i>                | Recombinant | Glcα1-2Glc                                                                          |
| 95 CSA              | <i>Oncorhynchus keta</i>           | Natural     | Rhamnose, Galα1-4Gal                                                                |
| 96 FLAG-EW29Ch-E20r | <i>Lumbricus terrestris</i>        | Recombinant | 6-sulfo-Gal                                                                         |

<sup>1</sup>Abbreviations: Gal (D-galactose), GalNAc (N-acetyl-galactosamine), GlcNAc (N-acetyl-glucosamine), Fuc (L-fucose), Glc (D-glucose), Sia (Sialic acid), LacNAc (N-acetyl-lactosamine).<sup>2</sup>Specificity data was obtained by frontal affinity chromatography and glycoconjugate microarray.
