# Supplementary material for: Interferon-α alters host glycosylation machinery during treated HIV infection
Source: PubMed Central journal article supplement — eBioMedicine. 2020 Aug 19;59:102945. doi: 10.1016/j.ebiom.2020.102945 (PMC7452630; doi:10.1016/j.ebiom.2020.102945), 2020-08-19
Supplement: mmc10.pdf [file mmc10.pdf]

Supplementary Table 5. P values and rho of data shown in Figure 6B

Fold Reduction of

| Lectin |     | %CD107α <sup>+</sup> | %CD107α <sup>+</sup> Perforin <sup>+</sup> | %CD107α <sup>+</sup> TNFα <sup>+</sup> | %CD107α <sup>+</sup> IFNγ <sup>+</sup> | %Eomes <sup>+</sup> | %Perforin <sup>+</sup> | %Tbet <sup>hi</sup> Eomes <sup>+</sup> | %Tbet <sup>+</sup> | %IFNγ <sup>+</sup> | %TNFα <sup>+</sup> | MFI of PD1 | MFI of Eomes | MFI of IFNγ | MFI of Perforin | MFI of Tbet | MFI of TNFα |        |
|--------|-----|----------------------|--------------------------------------------|----------------------------------------|----------------------------------------|---------------------|------------------------|----------------------------------------|--------------------|--------------------|--------------------|------------|--------------|-------------|-----------------|-------------|-------------|--------|
| ACG    | rho |                      | 0.768                                      |                                        |                                        |                     |                        |                                        |                    |                    |                    |            |              |             |                 |             |             | -0.821 |
|        | P   |                      | 0.044                                      |                                        |                                        |                     |                        |                                        |                    |                    |                    |            |              |             |                 |             |             | 0.034  |
| SNA    | rho |                      |                                            | -0.857                                 | -0.857                                 |                     |                        |                                        |                    |                    |                    |            |              |             |                 |             |             | -0.821 |
|        | P   |                      |                                            | 0.024                                  | 0.024                                  |                     |                        |                                        |                    |                    |                    |            |              |             |                 |             |             | 0.034  |
| TJAI   | rho |                      |                                            |                                        |                                        |                     |                        |                                        |                    |                    |                    | -0.9286    |              |             |                 |             |             |        |
|        | P   |                      |                                            |                                        |                                        |                     |                        |                                        |                    |                    |                    | 0.0067     |              |             |                 |             |             |        |
| Gal9N  | rho |                      |                                            | 0.929                                  | 0.929                                  | 0.786               |                        |                                        |                    |                    |                    |            |              |             | 0.929           |             |             |        |
|        | P   |                      |                                            | 0.007                                  | 0.007                                  | 0.048               |                        |                                        |                    |                    |                    |            |              |             | 0.007           |             |             |        |
| PVL    | rho |                      | -0.7881                                    |                                        |                                        |                     |                        |                                        |                    |                    |                    |            |              |             |                 |             |             |        |
|        | P   |                      | 0.0353                                     |                                        |                                        |                     |                        |                                        |                    |                    |                    |            |              |             |                 |             |             |        |

Fold Induction of

| Lectin |     | %CD107α <sup>+</sup> | %CD107α <sup>+</sup> Perforin <sup>+</sup> | %CD107α <sup>+</sup> TNFα <sup>+</sup> | %CD107α <sup>+</sup> IFNγ <sup>+</sup> | %Eomes <sup>+</sup> | %Perforin <sup>+</sup> | %Tbet <sup>hi</sup> Eomes <sup>+</sup> | %Tbet <sup>+</sup> | %IFNγ <sup>+</sup> | %TNFα <sup>+</sup> | MFI of PD1 | MFI of Eomes | MFI of IFNγ | MFI of Perforin | MFI of Tbet | MFI of TNFα |       |
|--------|-----|----------------------|--------------------------------------------|----------------------------------------|----------------------------------------|---------------------|------------------------|----------------------------------------|--------------------|--------------------|--------------------|------------|--------------|-------------|-----------------|-------------|-------------|-------|
| ABA    | rho |                      |                                            |                                        |                                        | -0.929              | -0.964                 | -0.893                                 | -0.857             |                    |                    |            |              | -0.857      | -0.786          | -0.857      |             |       |
|        | P   |                      |                                            |                                        |                                        | 0.007               | 0.003                  | 0.012                                  | 0.024              |                    |                    |            |              | 0.024       | 0.048           | 0.024       |             |       |
| HEA    | rho |                      |                                            | -0.821                                 | -0.821                                 | -0.821              |                        |                                        | -0.857             |                    |                    |            |              | -0.786      | -0.929          | -0.786      |             |       |
|        | P   |                      |                                            | 0.034                                  | 0.034                                  | 0.034               |                        |                                        | 0.024              |                    |                    |            |              | 0.048       | 0.007           | 0.048       |             |       |
| ACA    | rho |                      |                                            |                                        |                                        | -0.786              |                        |                                        |                    |                    |                    |            |              |             |                 |             |             |       |
|        | P   |                      |                                            |                                        |                                        | 0.048               |                        |                                        |                    |                    |                    |            |              |             |                 |             |             |       |
| MAL    | rho |                      |                                            | -0.857                                 | -0.857                                 | -0.821              |                        | -0.786                                 |                    |                    |                    | -0.893     |              |             |                 | -0.857      |             |       |
|        | P   |                      |                                            | 0.024                                  | 0.024                                  | 0.034               |                        | 0.048                                  |                    |                    |                    | 0.012      |              |             | 0.024           |             |             |       |
| PHA(E) | rho | -0.857               |                                            | 0.857                                  | 0.857                                  |                     |                        |                                        |                    | -0.857             |                    |            |              |             |                 |             |             | 0.821 |
|        | P   | 0.024                |                                            | 0.024                                  | 0.024                                  |                     |                        |                                        |                    | 0.024              |                    |            |              |             |                 |             |             | 0.034 |
| CGL2   | rho |                      |                                            |                                        |                                        |                     |                        |                                        |                    |                    |                    | 0.786      | 0.893        |             |                 |             |             |       |
|        | P   |                      |                                            |                                        |                                        |                     |                        |                                        |                    |                    |                    | 0.048      | 0.012        |             |                 |             |             |       |
| TxLcl  | rho |                      |                                            |                                        |                                        |                     |                        |                                        |                    | -0.929             | -0.857             |            |              |             |                 |             |             |       |
|        | P   |                      |                                            |                                        |                                        |                     |                        |                                        |                    | 0.007              | 0.024              |            |              |             |                 |             |             |       |
