# Supplementary material for: Interferon-α alters host glycosylation machinery during treated HIV infection
Source: PubMed Central journal article supplement — eBioMedicine. 2020 Aug 19;59:102945. doi: 10.1016/j.ebiom.2020.102945 (PMC7452630; doi:10.1016/j.ebiom.2020.102945), 2020-08-19
Supplement: mmc11.pdf [file mmc11.pdf]

Supplementary Table 6. P values and rho of data shown in Figure 7B

Fold Reduction of

| Lectin |            | %CD107α <sup>+</sup> | %CD107α <sup>+</sup> IFNγ <sup>+</sup> | %Eomes <sup>+</sup> | %Perforin <sup>+</sup> | %Tbet <sup>+</sup> | %Tbet <sup>hi</sup> Eomes <sup>+</sup> | %TNFα <sup>+</sup> | MFI of CD107α | MFI of IFNγ | MFI of Perforin | MFI of Eomes | MFI of TNFα |
|--------|------------|----------------------|----------------------------------------|---------------------|------------------------|--------------------|----------------------------------------|--------------------|---------------|-------------|-----------------|--------------|-------------|
| ABA    | <i>rho</i> |                      |                                        | 0.964               |                        | 0.964              | 0.929                                  |                    | 0.964         | 0.929       | -0.786          | 0.821        |             |
|        | <i>P</i>   |                      |                                        | 0.003               |                        | 0.003              | 0.007                                  |                    | 0.003         | 0.007       | 0.048           | 0.034        |             |

Fold Induction of

| Lectin |            | %CD107α <sup>+</sup> | %CD107α <sup>+</sup> IFNγ <sup>+</sup> | %Eomes <sup>+</sup> | %Perforin <sup>+</sup> | %Tbet <sup>+</sup> | %Tbet <sup>hi</sup> Eomes <sup>+</sup> | %TNFα <sup>+</sup> | MFI of CD107α | MFI of IFNγ | MFI of Perforin | MFI of Eomes | MFI of TNFα |
|--------|------------|----------------------|----------------------------------------|---------------------|------------------------|--------------------|----------------------------------------|--------------------|---------------|-------------|-----------------|--------------|-------------|
| MAH    | <i>rho</i> |                      |                                        | -0.821              |                        | -0.821             |                                        |                    | -0.821        |             |                 |              |             |
|        | <i>P</i>   |                      |                                        | 0.034               |                        | 0.034              |                                        |                    | 0.034         |             |                 |              |             |
| AOL    | <i>rho</i> |                      | -0.786                                 |                     | 0.89286                |                    |                                        | -0.82143           |               |             |                 |              |             |
|        | <i>P</i>   |                      | 0.048                                  |                     | 0.0123                 |                    |                                        | 0.03413            |               |             |                 |              |             |
| LCA    | <i>rho</i> | -0.786               |                                        | 0.857               |                        | 0.857              | 0.929                                  |                    | 0.857         | 0.929       | -0.893          |              | 0.786       |
|        | <i>P</i>   | 0.048                |                                        | 0.024               |                        | 0.024              | 0.007                                  |                    | 0.024         | 0.007       | 0.012           |              | 0.048       |
| HHL    | <i>rho</i> |                      |                                        |                     |                        |                    |                                        |                    |               | 0.821       |                 |              | 0.893       |
|        | <i>P</i>   |                      |                                        |                     |                        |                    |                                        |                    |               | 0.034       |                 |              | 0.012       |
