# Supplementary figures and images for: Interferon-α alters host glycosylation machinery during treated HIV infection
Source: PubMed Central journal article supplement — eBioMedicine. 2020 Aug 19;59:102945. doi: 10.1016/j.ebiom.2020.102945 (PMC7452630; doi:10.1016/j.ebiom.2020.102945), 2020-08-19

# Supplementary Figure 3

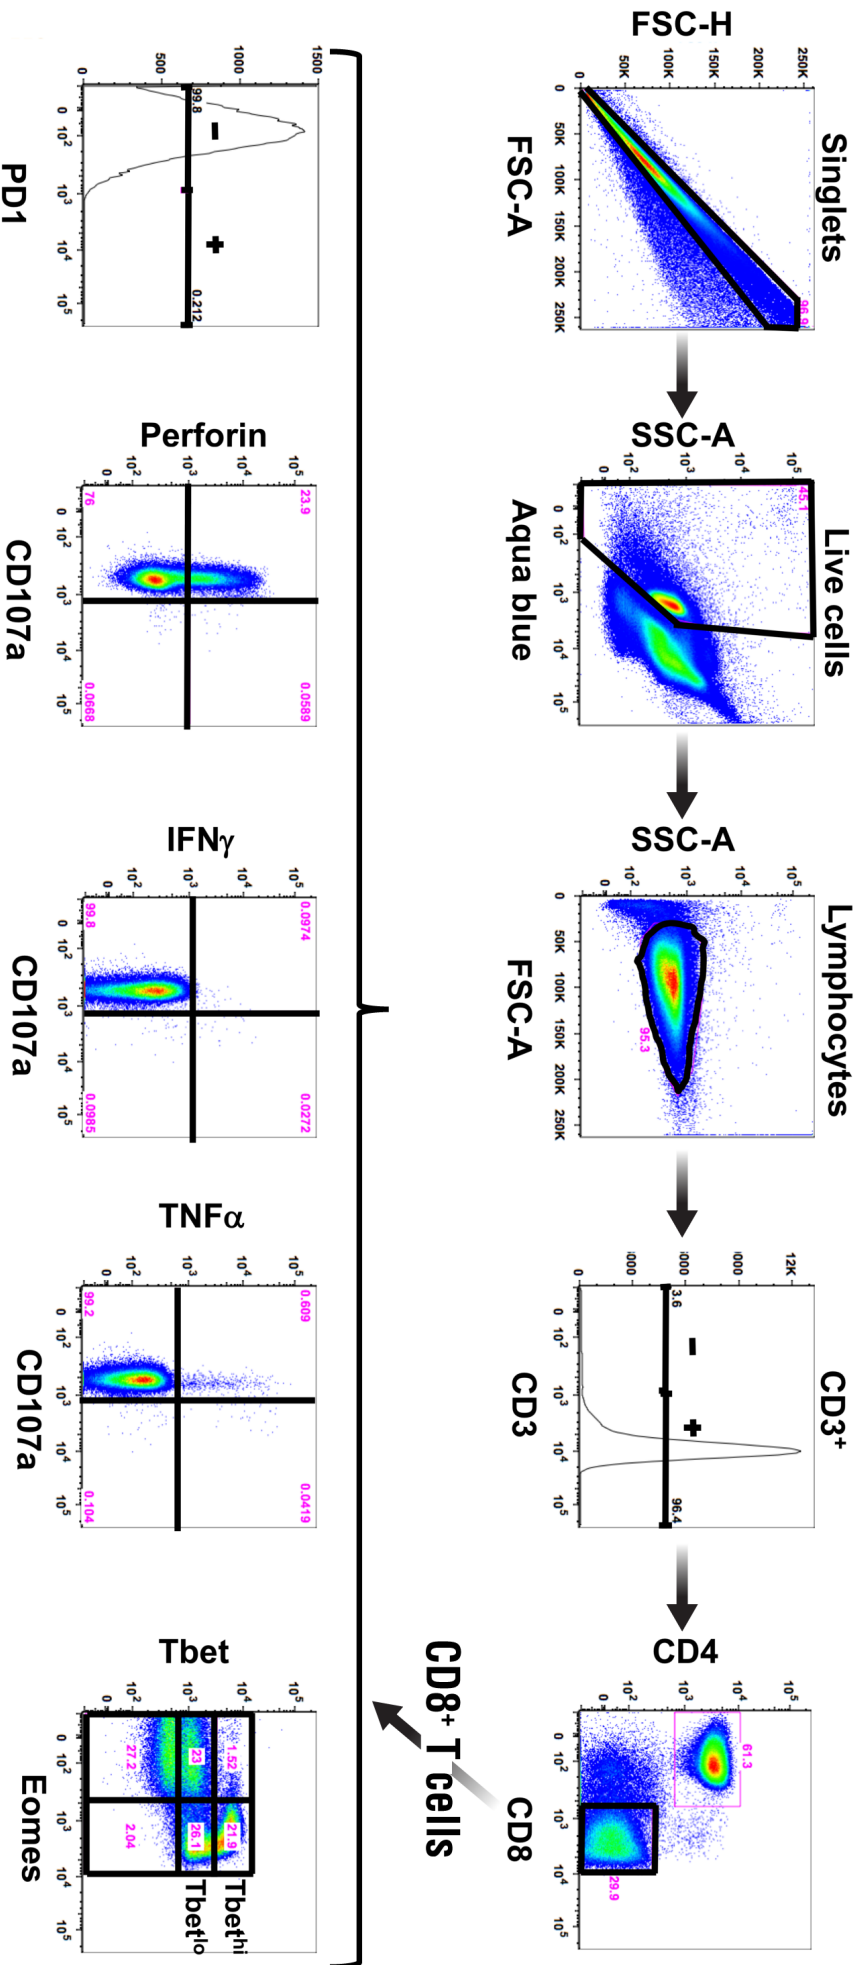

Supplement: mmc3.pdf [file mmc3.pdf]

# Supplementary Figure 4

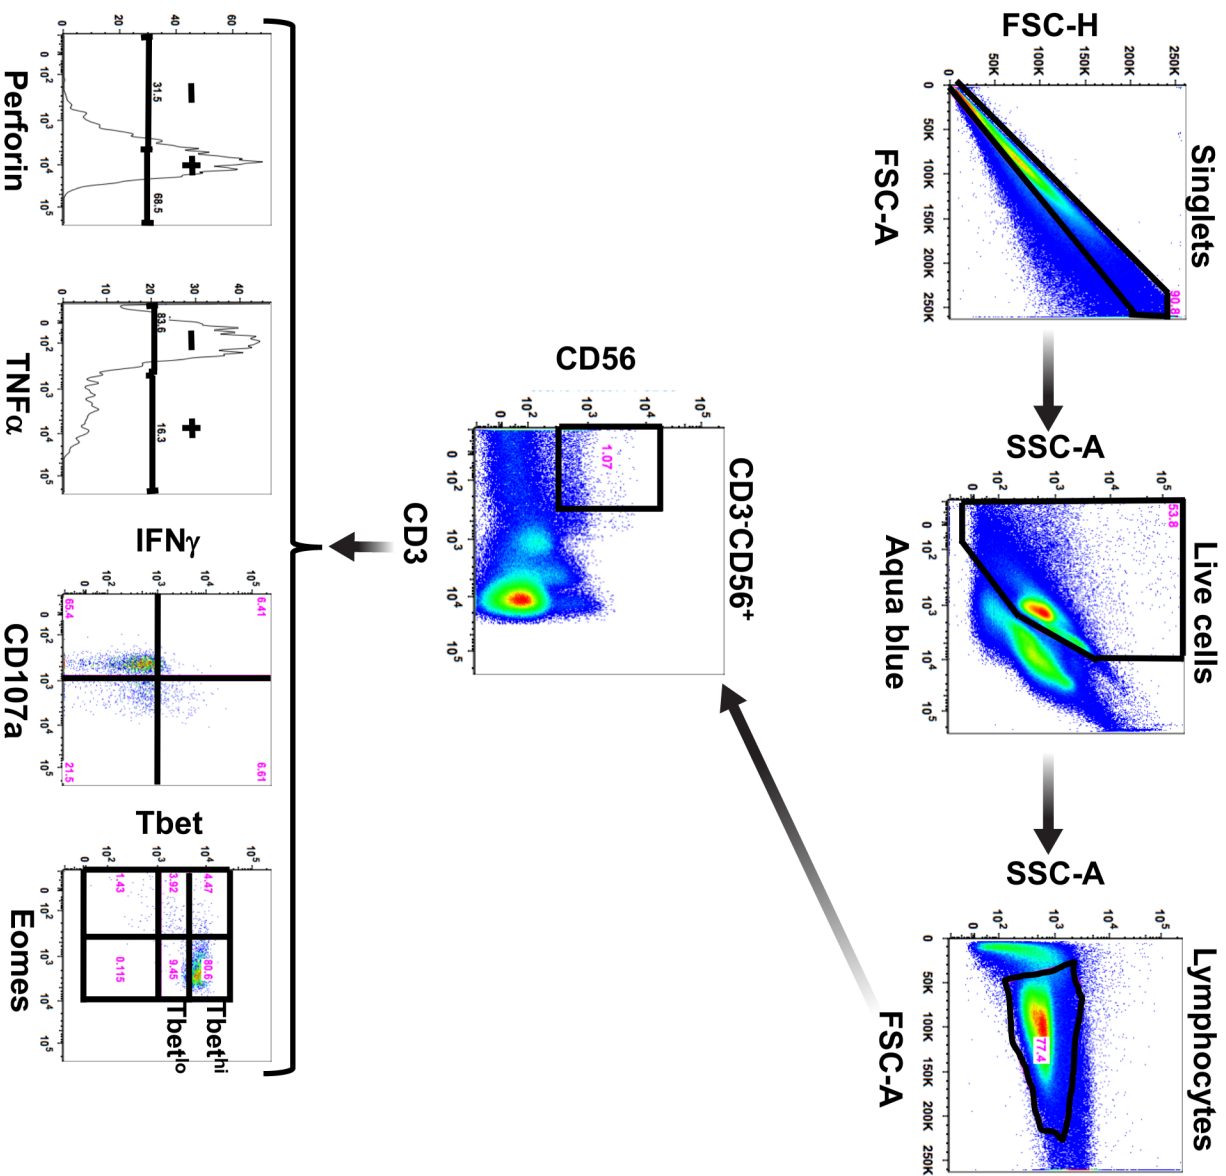

Supplement: mmc4.pdf [file mmc4.pdf]

# Supplementary Figure 5

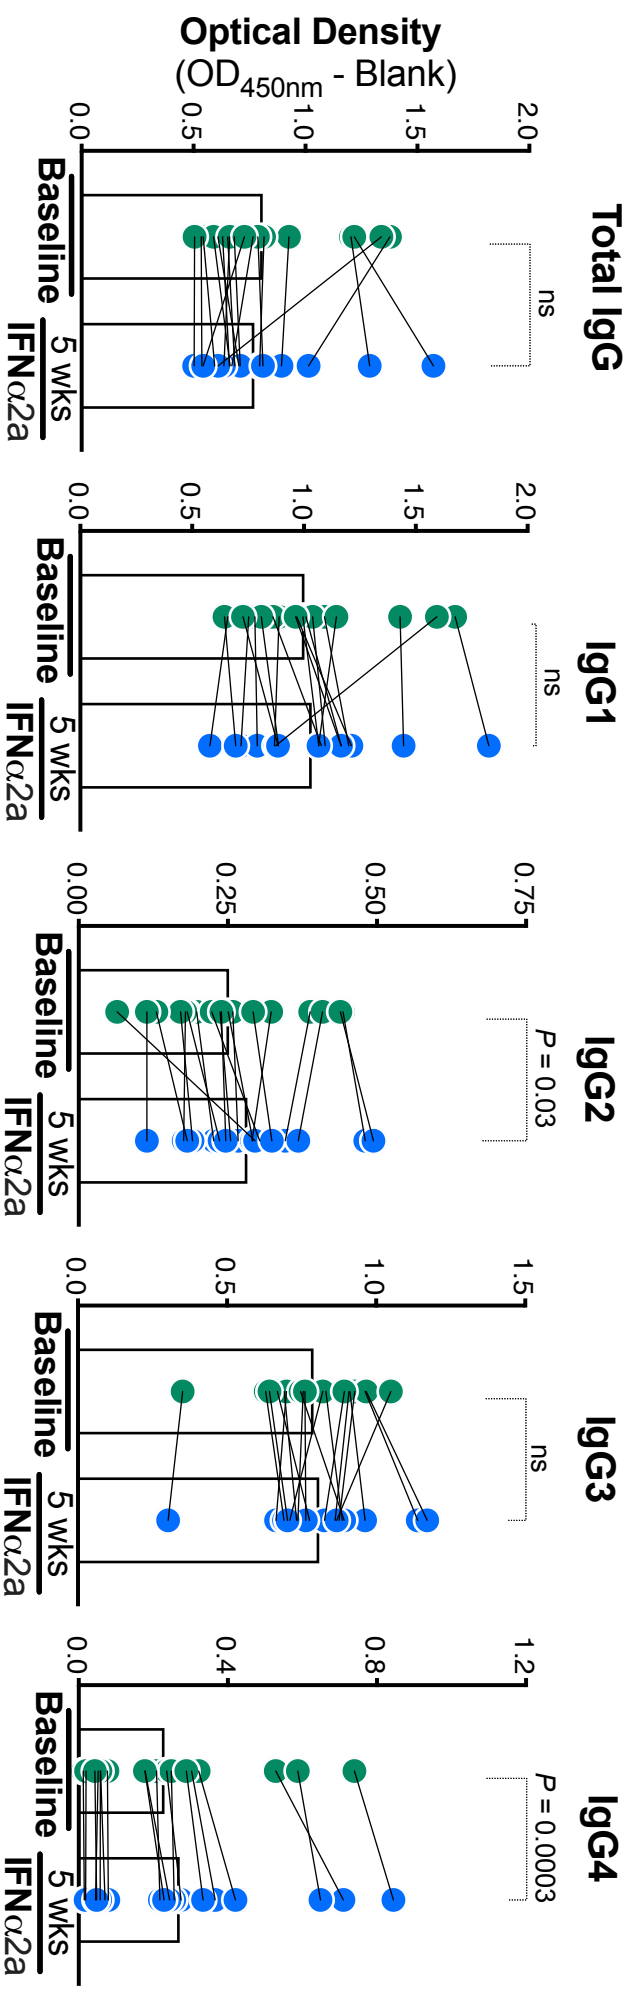

Supplement: mmc5.pdf [file mmc5.pdf]
